# Supplementary material
Source: HighWire-hosted journal article supplement (https://gut.bmj.com/content/72/7/1319)
Supplement: inline-supplementary-material-1 [file inline-supplementary-material-1.pdf]

**Appendix****Table 1: Multivariable logistic regression analyses for impact of the invitation time period on the key performance indicators for subsequent invitation round**

| Period        | FIT participation |      |           | FIT positivity |      |           | Follow-up colonoscopy |      |           | Interval cancers   |      |           |
|---------------|-------------------|------|-----------|----------------|------|-----------|-----------------------|------|-----------|--------------------|------|-----------|
|               | %                 | OR   | 95% CI    | %              | OR   | 95% CI    | %                     | OR   | 95% CI    | Per 10.000         | OR   | 95% CI    |
| <i>Before</i> | 92.3%             | REF* |           | 4.1%           | REF  |           | 87.4%                 | REF* |           | 7.8                | REF  |           |
| <i>During</i> | 89.3%             | 0.73 | 0.72 0.74 | 3.9%           | 1.00 | 0.98 1.03 | 86.8%                 | 0.89 | 0.83 0.95 | 7.0                | 1.04 | 0.88 1.23 |
| <i>After</i>  | 92.0%             | 1.03 | 1.01 1.04 | 3.8%           | 1.02 | 1.00 1.03 | 87.9%                 | 0.91 | 0.87 0.96 | 5.7                | 1.07 | 0.94 1.22 |
| Period        | PPV CRC           |      |           | PPV AN#        |      |           | Detection rate CRC    |      |           | Detection rate AN# |      |           |
|               | %                 | OR   | 95% CI    | %              | OR   | 95% CI    | %                     | OR   | 95% CI    | %                  | OR   | 95% CI    |
| <i>Before</i> | 5.3%              | REF* |           | 34.7%          | REF* |           | 0.19%                 | REF* |           | 1.25%              | REF* |           |
| <i>During</i> | 4.6%              | 0.91 | 0.81 1.03 | 31.8%          | 0.91 | 0.86 0.96 | 0.16%                 | 0.90 | 0.80 1.01 | 1.09%              | 0.92 | 0.88 0.96 |
| <i>After</i>  | 4.2%              | 0.91 | 0.84 0.99 | 32.0%          | 0.95 | 0.92 0.98 | 0.14%                 | 0.92 | 0.85 0.99 | 1.07%              | 0.97 | 0.94 1.00 |

All Odds Ratios are adjusted for confounding variables age, sex and invitation round.

REF\* indicates that the alternative model (including the time period) better fitted the data. Note, all ORs are presented for the alternative model including time period, regardless if it improved the model.

# AN is the combination of colorectal cancer and advanced neoplasia.

Abbreviations: AN (advanced neoplasia), CI (confidence interval), CRC (colorectal cancer), OR (Odds Ratio), PPV (positive predictive value).

**Table 2: Multivariable logistic regression analyses for impact of the invitation interval on the key performance indicators**

| Invitation interval (months) | FIT participation |      |           | FIT positivity |      |           | Participation colonoscopy |      |           | Interval cancers  |      |           |
|------------------------------|-------------------|------|-----------|----------------|------|-----------|---------------------------|------|-----------|-------------------|------|-----------|
|                              | %                 | OR   | 95% CI    | %              | OR   | 95% CI    | %                         | OR   | 95% CI    | *10,000           | OR   | 95% CI    |
| <=24-25                      | 91.6%             | REF* |           | 4.1%           | REF* |           | 87.3%                     | REF  |           | 7.3               | REF  |           |
| 25-26                        | 91.4%             | 1.00 | 0.98 1.02 | 3.9%           | 1.04 | 1.01 1.07 | 87.0%                     | 0.90 | 0.83 0.97 | 6.2               | 1.11 | 0.91 1.37 |
| 26-27                        | 91.9%             | 1.06 | 1.05 1.08 | 3.8%           | 1.02 | 1.00 1.05 | 87.9%                     | 0.96 | 0.89 1.03 | 6.3               | 1.18 | 0.98 1.41 |
| 27-28                        | 91.9%             | 1.06 | 1.04 1.07 | 3.8%           | 1.05 | 1.02 1.08 | 88.1%                     | 0.98 | 0.90 1.06 | 6.6               | 1.24 | 1.01 1.53 |
| 28-29                        | 92.0%             | 1.07 | 1.04 1.09 | 3.9%           | 1.05 | 1.01 1.09 | 89.0%                     | 1.05 | 0.94 1.17 | 7.8               | 1.41 | 1.09 1.83 |
| >29                          | 92.4%             | 1.15 | 1.11 1.19 | 3.8%           | 1.01 | 0.96 1.05 | 88.9%                     | 1.10 | 0.95 1.27 | 7.3               | 1.31 | 0.86 1.98 |
|                              | PPV CRC           |      |           | PPV AN#        |      |           | Detection rate CRC        |      |           | Detection rate AN |      |           |
| <=24-25                      | 5.1%              | REF  |           | 33.9%          | REF  |           | 0.18%                     | REF  |           | 1.20%             | REF  |           |
| 25-26                        | 4.7%              | 1.02 | 0.89 1.17 | 32.9%          | 1.02 | 0.96 1.09 | 0.16%                     | 1.04 | 0.92 1.19 | 1.11%             | 0.78 | 0.75 1.09 |
| 26-27                        | 4.6%              | 1.01 | 0.89 1.14 | 31.9%          | 1.01 | 0.96 1.07 | 0.15%                     | 1.02 | 0.91 1.15 | 1.07%             | 1.04 | 0.99 1.07 |
| 27-28                        | 3.9%              | 0.89 | 0.77 1.02 | 31.3%          | 0.98 | 0.92 1.04 | 0.13%                     | 0.93 | 0.81 1.07 | 1.06%             | 1.02 | 0.98 1.08 |
| 28-29                        | 4.1%              | 0.89 | 0.74 1.08 | 33.4%          | 1.05 | 0.97 1.14 | 0.14%                     | 0.94 | 0.78 1.13 | 1.15%             | 1.02 | 0.97 1.16 |
| >29                          | 4.3%              | 0.92 | 0.72 1.17 | 32.8%          | 1.04 | 0.94 1.15 | 0.28%                     | 0.94 | 0.74 1.19 | 2.16%             | 1.09 | 1.02 1.13 |

All Odds Ratios are adjusted for confounding variables age, sex and invitation round. \*indicates that the alternative model (including the time period) better fit the data.

Note, all ORs are presented for the alternative model including time period, regardless it improved the model.

# AN is the combination of CRC and AA.

Abbreviations: AN (advanced neoplasia), AA (advanced adenomas), CI (confidence interval), CRC (colorectal cancer), OR (Odds Ratio), PPV (positive predictive value).
